# Supplementary material for: Polyamines and Hypusination Are Required for Ebolavirus Gene Expression and Replication
Source: PubMed Central journal article supplement (PMC4981715; doi:10.1128/mbio.00882-16), 2016-07-26

Relative Expression Level

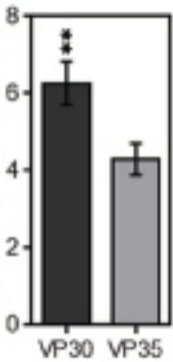

Supplement: mbo004162921sf3.pdf [file mbo004162921sf3.pdf]
